# Supplementary material
Source: publisher site journal article supplement (https://www.degruyterbrill.com/publication/journal_key/IJCRE/downloadAsset/IJCRE_Call%20for%20Papers%20for%20Special%20Issue%20in%20IJCRE.docx)
Supplement: Supplementary file 1 [file IJCRE_Call%20for%20Papers%20for%20Special%20Issue%20in%20IJCRE.docx]

**Call for Papers for Special Issue in IJCRE (International Journal of Chemical Reactor Engineering)**

***On the occasion of the*** ***International Conference on*** ***Navigating Global Energy Transition for Sustainable Future (ICNETS 2024) part of Energy Summit-2024.***

***September 18-20, 2024.***

We are pleased to announce the call for papers for Special Issues in the IJCRE journal to be published on the occasion of the International Conference on Navigating Global Energy Transition for Sustainable Future (ICNETS 2024) which is a main event of the Energy Summit-2024 to be held at UPES, Dehradun, India from 18-20 September 2024 in hybrid mode.

[***https://upesenergysummit2022.org/***](https://upesenergysummit2022.org/)

*The major themes of the special issues are (but not limited to)*

Fuels, Renewable Energy, Fuel Cells, Digitization in Energy Sectors, Chemical Reaction and Reactor Engineering, Carbon Capture Storage and Valorization, [Circular Economy in Energy](https://upesenergysummit2024.com/#faq4), [Green Energy production, conversion, and utilization](https://upesenergysummit2024.com/#faq3)Energy Transport and Storage, Modeling, Simulation and Optimization of Chemical Processes, Environmental Protection and Sustainability, Hybrid Energy Ecosystems, Advanced Materials in Energy Research, Low-cost Rural Energy Technologies.

The original and previously unpublished articles (invited for presentation in the conference, ***ICNETS 2024***) on the above-mentioned themes has to be submitted online through the IJCRE manuscript submission portal,[***https://mc.manuscriptcentral.com/dgijcre***](https://mc.manuscriptcentral.com/dgijcre). The submitted articles undergo a ***standard peer-review process*** (by two/three eminent, ***International***, Referees) and the decision of acceptance will be based on the novelty, quality, contribution and significance to the theme of the Conference.

Please see the authors' guidelines ***https://www.degruyter.com/publication/journal_key/IJCRE/downloadAsset/IJCRE_Author%20Instructions%20-%20Manuscript%20Guidelines.pdf***

Dr. Ajay Ray ([***aray6@uwo.ca***](mailto:aray6@uwo.ca)) from Western University, London, ON, Dr. Amit K. Thakur ([***akthakur@ddn.upes.ac.in***](mailto:akthakur@ddn.upes.ac.in)) from UPES, Dehradun, India are acting as Guest Editors for the special issues. For any queries related to themes and manuscript suitability related to the special issue, please contact Dr. Amit K. Thakur directly.

Deadline for the submission of the article to conference: **Sep 8, 2024.**

Deadline for the submission of the article to IJCRE: **March 15, 2025.**
